# Supplementary material for: Collective waves in dense and confined microfluidic droplet arrays
Source: Royal Society of Chemistry journal article supplement (doi:10.1039/c5sm01116g), 2015-01-01
Supplement: c5sm01116g1.pdf [file c5sm01116g1.pdf]

droplet\_40\_440\_15\_40.0\_20000.0\_0.1\_0.005\_defect2.wmv:

Simulation movie of a longitudinal pairing wave of 40 droplets with an average spacing of 2.2 times the droplet radius. This movie shows the initial pairing cascades.

droplet\_40\_480\_15\_40.0\_20000.0\_0.1\_0.005\_defect2.wmv:

Simulation movie of a longitudinal pairing wave of 40 droplets with an average spacing of 2.4 times the droplet radius. This movie shows how a subregion of the train “freezes” into a zigzag pattern while another part exhibits a travelling sine-like wave.

droplet\_90\_1000\_15\_40.0\_20000.0\_0.1\_0.005\_wave5.wmv:

Simulation movie of a transverse sine-like wave of an array of droplets with a wavelength of 5 droplet distances. This movie shows how an initial asymmetry is maintained in the travelling wave.

droplet\_90\_1000\_15\_40.0\_20000.0\_0.1\_0.005\_wave6.wmv:

Simulation movie of a transverse sine-like wave of an array of droplets with a wavelength of 6 droplet distances. This movie shows the coupling between the transverse and longitudinal motion of the droplets.
